# Supplementary material for: The Regenerative Effect of Trans-spinal Magnetic Stimulation After Spinal Cord Injury: Mechanisms and Pathways Underlying the Effect
Source: Springer Nature journal article supplement (doi:10.1007/s13311-020-00915-5), 2020-08-27
Supplement: MOESM1 [file 25807266]

**Supplement Table I Number of mice used under all paradigms analyzed.**

| Fig.1        | Mouse line     | Experiments       | n          |
|--------------|----------------|-------------------|------------|
| SCI          | C57BL/6        | IHC (15 + 90 DPI) | 5+4        |
| SCI+STM      | C57BL/6        | IHC (15 + 90 DPI) | 5+4        |
| Fig.2        | Mouse line     | Experiments       | n          |
| SCI          | C57BL/6        | Locotronic        | 7          |
| SCI+STM      | C57BL/6        | Locotronic        | 6          |
| Fig.3        | Mouse line     | Experiments       | n          |
| SCI          | C57BL/6        | Proteomics        | 4          |
| SCI+STM      | C57BL/6        | Proteomics        | 4          |
| Fig.4        | Mouse line     | Experiments       | n          |
| SCI          | C57BL/6        | IHC (MBP)         | 6          |
| SCI+STM      | C57BL/6        | IHC (MBP)         | 5          |
| SCI          | hFoxJ1/C57BL/6 | IHC (NeuN)        | 4          |
| SCI+STM      | hFoxJ1/C57BL/6 | IHC (NeuN)        | 4          |
| SCI          | C57BL/6        | BDA               | 3          |
| SCI+STM      | C57BL/6        | BDA               | 3          |
| Fig.5        | Mouse line     | Experiments       | n          |
| SCI          | C57BL/6        | Neurospheres      | 4          |
| SCI+STM      | C57BL/6        | Neurospheres      | 4          |
| SCI          | hFoxJ1/C57BL/6 | IHC               | 5          |
| SCI+STM      | hFoxJ1/C57BL/6 | IHC               | 5          |
| Fig.6        | Mouse line     | Experiments       | n          |
| SCI          | C57BL/6        | Locotronic        | 9          |
| SCI+STM      | C57BL/6        | Locotronic + IHC  | 9          |
| SCI          | C57BL/6        | IHC               | 4          |
| Fig.7        | Mouse line     | Experiments       | n          |
| SCI          | C57BL/6        | Locotronic        | 7          |
| SCI+STM      | C57BL/6        | Locotronic + IHC  | 7          |
| SCI          | C57BL/6        | IHC               | 5          |
| Fig.8        | Mouse line     | Experiments       | n          |
| SCI          | C57BL/6        | Locotronic        | 7          |
| SCI+STM      | C57BL/6        | Locotronic + IHC  | 7          |
| SCI          | C57BL/6        | IHC               | 4          |
| <b>Total</b> |                |                   | <b>118</b> |

**Supplement Table II Statistical analyses performed in all Figures.** DPI: Day Post

Injury.

**Statistical analyses performed in all figures**

| <b>Figure and section</b> | <b>statistical test</b>        | <b>comparison</b>                                          | <b>p-value</b> |
|---------------------------|--------------------------------|------------------------------------------------------------|----------------|
| <b>1.D</b>                | Two-tailed Mann-Whitney U test | Control/Stm<br>PDGFβ <sup>+</sup> - area 15d post SCI      | 0.0079         |
| <b>1.G</b>                | Two-tailed Mann-Whitney U test | Control/Stm<br>PDGFβ <sup>+</sup> -area 90d post SCI       | 0.0286         |
| <b>1.J</b>                | Two-tailed Mann-Whitney U test | Control/Stm<br>GFAP <sup>-</sup> -area 15d post SCI        | 0.0159         |
| <b>1.M</b>                | Two-tailed Mann-Whitney U test | Control/Stm<br>GFAP <sup>-</sup> -area 90d post SCI        | 0.0286         |
| <b>1.P</b>                | Two-tailed Mann-Whitney U test | Control/Stm<br>Iba1 <sup>+</sup> - area15d post SCI        | 0.0079         |
| <b>2.B</b>                | Two-tailed Mann-Whitney U test | Control/Stm<br>Number of back legs errors<br>15d post SCI  | 0.0730         |
| <b>2.C</b>                | Two-tailed Mann-Whitney U test | Control/Stm<br>Total back legs errors time<br>15d post SCI | 0.0530         |
| <b>2.D</b>                | Two-tailed Mann-Whitney U test | Control/Stm<br>Total crossing time<br>15d post SCI         | 0.0148         |
| <b>2.E</b>                | Two-tailed Mann-Whitney U test | Control/Stm<br>Number of back legs errors<br>30d post SCI  | 0.0006         |
| <b>2.F</b>                | Two-tailed Mann-Whitney U test | Control/Stm<br>Total back legs errors time<br>30d post SCI | 0.0221         |
| <b>2.G</b>                | Two-tailed Mann-Whitney U test | Control/Stm<br>Total crossing time<br>30d post SCI         | 0.0047         |

|            |                                |                                                                                                                             |        |
|------------|--------------------------------|-----------------------------------------------------------------------------------------------------------------------------|--------|
| <b>4.C</b> | Two-tailed Mann-Whitney U test | Control/Stm<br>MBP <sup>+</sup> area 15d post SCI                                                                           | 0.0286 |
| <b>4.F</b> | Two-tailed Mann-Whitney U test | Control/Stm<br>NeuN <sup>+</sup> cells<br>15d post SCI                                                                      | 0.0286 |
| <b>5.B</b> | Two-tailed Mann-Whitney U test | Control/Stm<br>Number of primary neurospheres<br>15d post SCI                                                               | 0.0286 |
| <b>5.C</b> | Two-tailed Mann-Whitney U test | Control/Stm<br>mean fluorescence intensity of tomato <sup>+</sup> cells<br>15d post SCI                                     | 0.0286 |
| <b>5.H</b> | Two-tailed Mann-Whitney U test | Control/Stm<br>Pourcentage of recombined Tomato <sup>+</sup> -GFAP <sup>+</sup> /Tomato <sup>+</sup> cells<br>15d post SCI  | 0.0294 |
| <b>5.K</b> | Two-tailed Mann-Whitney U test | Control/Stm<br>Pourcentage of recombined Tomato <sup>+</sup> -Sox10 <sup>+</sup> /Tomato <sup>+</sup> cells<br>15d post SCI | 0.0286 |
| <b>6.B</b> | Two-tailed Mann-Whitney U test | Chronical context stimulation<br>Control/Stm 25d post SCI<br>Number of back legs errors                                     | 0.0070 |
| <b>6.B</b> | Two-tailed Mann-Whitney U test | Chronical context stimulation<br>Control/Stm 40d post SCI<br>Number of back legs errors                                     | 0.0076 |
| <b>6.C</b> | Two-tailed Mann-Whitney U test | Chronical context stimulation<br>Control/Stm 25d post SCI<br>Total back legs errors time                                    | 0.0056 |
| <b>6.C</b> | Two-tailed Mann-Whitney U test | Chronical context stimulation<br>Control/Stm 40d post SCI<br>Total back legs errors time                                    | 0.0120 |
| <b>6.D</b> | Two-tailed Mann-Whitney U test | Chronical context stimulation<br>Control/Stm 25d post SCI<br>Total crossing time                                            | 0.0041 |

|            |                                |                                                                                          |        |
|------------|--------------------------------|------------------------------------------------------------------------------------------|--------|
| <b>6.D</b> | Two-tailed Mann-Whitney U test | Chronical context stimulation<br>Control/Stm 40d post SCI<br>Total crossing time         | 0.0016 |
| <b>6.G</b> | Two-tailed Mann-Whitney U test | Chronical context stimulation<br>Control/Stm<br>PDGF $\beta$ -area 90d post SCI          | 0.0286 |
| <b>6.J</b> | Two-tailed Mann-Whitney U test | Chronical context stimulation<br>Control/Stm<br>GFAP <sup>+</sup> area 15d post SCI      | 0.0079 |
| <b>7.B</b> | Two-tailed Mann-Whitney U test | Chronical context stimulation<br>Control/Stm 25d post SCI<br>Number of back legs errors  | 0.0021 |
| <b>7.B</b> | Two-tailed Mann-Whitney U test | Chronical context stimulation<br>Control/Stm 40d post SCI<br>Number of back legs errors  | 0.0021 |
| <b>7.C</b> | Two-tailed Mann-Whitney U test | Chronical context stimulation<br>Control/Stm 25d post SCI<br>Total back legs errors time | 0.0111 |
| <b>7.C</b> | Two-tailed Mann-Whitney U test | Chronical context stimulation<br>Control/Stm 40d post SCI<br>Total back legs errors time | 0.0111 |
| <b>7.D</b> | Two-tailed Mann-Whitney U test | Chronical context stimulation<br>Control/Stm 25d post SCI<br>Total crossing time         | 0.0006 |
| <b>7.D</b> | Two-tailed Mann-Whitney U test | Chronical context stimulation<br>Control/Stm 40d post SCI<br>Total crossing time         | 0.0026 |
| <b>7.G</b> | Two-tailed Mann-Whitney U test | Chronical context stimulation<br>Control/Stm<br>PDGF $\beta$ -area 90d post SCI          | 0.0043 |
| <b>8.B</b> | Two-tailed Mann-Whitney U test | Chronical context stimulation<br>Control/Stm 25d post SCI<br>Number of back legs errors  | 0.0262 |

|             |                                |                                                                                                 |        |
|-------------|--------------------------------|-------------------------------------------------------------------------------------------------|--------|
| <b>8.B</b>  | Two-tailed Mann-Whitney U test | Chronical context stimulation<br>Control/Stm 40d post SCI<br>Number of back legs errors         | 0.0101 |
| <b>8.C</b>  | Two-tailed Mann-Whitney U test | Chronical context stimulation<br>Control/Stm 25d post SCI<br>Total back legs errors time        | 0.8357 |
| <b>8.C</b>  | Two-tailed Mann-Whitney U test | Chronical context stimulation<br>Control/Stm 40d post SCI<br>Total back legs errors time        | 0.2468 |
| <b>8.D</b>  | Two-tailed Mann-Whitney U test | Chronical context stimulation<br>Control/Stm 25d post SCI<br>Total crossing time                | 0.2593 |
| <b>8.D</b>  | Two-tailed Mann-Whitney U test | Chronical context stimulation<br>Control/Stm 40d post SCI<br>Total crossing time                | 0.0732 |
| <b>8.G</b>  | Two-tailed Mann-Whitney U test | Chronical context stimulation<br>Control/Stm<br>PDGF $\beta$ -area 90d post SCI                 | 0.0286 |
| <b>S1.A</b> | Two-tailed Mann-Whitney U test | Chronical context stimulation<br>Control 1d/Control 10d post SCI<br>Number of back legs errors  | 0.2086 |
| <b>S1.B</b> | Two-tailed Mann-Whitney U test | Chronical context stimulation<br>Control 1d/Control 10d post SCI<br>Total back legs errors time | 0.6529 |
| <b>S1.C</b> | Two-tailed Mann-Whitney U test | Chronical context stimulation<br>Control 1d/Control 10d post SCI<br>Total crossing time         | 0.1590 |
| <b>S1.D</b> | Two-tailed Mann-Whitney U test | Chronical context stimulation<br>Control 1d/Control 10d post SCI<br>Number of back legs errors  | 0.9490 |
| <b>S1.E</b> | Two-tailed Mann-Whitney U test | Chronical context stimulation<br>Control 1d/Control 10d post SCI<br>Total back legs errors time | 0.8979 |

|             |                                |                                                                                                  |        |
|-------------|--------------------------------|--------------------------------------------------------------------------------------------------|--------|
| <b>S1.F</b> | Two-tailed Mann-Whitney U test | Chronical context stimulation<br>Control 1d/Control 10d post SCI<br>Total crossing time          | 0.712  |
| <b>S2.A</b> | Two-tailed Mann-Whitney U test | Control/Control<br>PDGFβ <sup>+</sup> area 15d/90d post SCI                                      | 0.2857 |
| <b>S2.A</b> | Two-tailed Mann-Whitney U test | Stm/Stm<br>PDGFβ <sup>+</sup> area 15d/90d post SCI                                              | 0.063  |
| <b>S2.B</b> | Two-tailed Mann-Whitney U test | Control/Control<br>GFAP <sup>+</sup> area 15d/90d post SCI                                       | 1      |
| <b>S2.B</b> | Two-tailed Mann-Whitney U test | Stm/Stm<br>GFAP <sup>+</sup> area 15d/90d post SCI                                               | 0.11   |
| <b>S3.A</b> | Two-tailed Mann-Whitney U test | Chronical context stimulation<br>Control 10d/Control 10d post SCI<br>Number of back legs errors  | 0.43   |
| <b>S3.A</b> | Two-tailed Mann-Whitney U test | Chronical context stimulation<br>Stm 25d/Stm 25d post SCI<br>Number of back legs error           | 0.3933 |
| <b>S3.A</b> | Two-tailed Mann-Whitney U test | Chronical context stimulation<br>Stm 40d/Stm 40d post SCI<br>Number of back legs error           | 0.7199 |
| <b>S3.B</b> | Two-tailed Mann-Whitney U test | Chronical context stimulation<br>Control 10d/Control 10d post SCI<br>Total back legs errors time | 0.0389 |
| <b>S3.B</b> | Two-tailed Mann-Whitney U test | Chronical context stimulation<br>Stm 25d/Stm 25d post SCI<br>Total back legs errors time         | 0.0618 |
| <b>S3.B</b> | Two-tailed Mann-Whitney U test | Chronical context stimulation<br>Stm 40d/Stm 40d post SCI<br>Total back legs errors time         | 0.83   |
| <b>S3.C</b> | Two-tailed Mann-Whitney U test | Chronical context stimulation<br>Control 10d/Control 10d post SCI<br>Total crossing time         | 0.7577 |



|             |                                |                                                                                                  |         |
|-------------|--------------------------------|--------------------------------------------------------------------------------------------------|---------|
| <b>S3.C</b> | Two-tailed Mann-Whitney U test | Chronical context stimulation<br>Stm 25d/Stm 25d post SCI<br>Total crossing time                 | 0.2429  |
| <b>S3.C</b> | Two-tailed Mann-Whitney U test | Chronical context stimulation<br>Stm 40d/Stm 40d post SCI<br>Total crossing time                 | 0.1326  |
| <b>S3.D</b> | Two-tailed Mann-Whitney U test | Chronical context stimulation<br>Control 10d/Control 10d post SCI<br>Number of back legs errors  | 0.43    |
| <b>S3.D</b> | Two-tailed Mann-Whitney U test | Chronical context stimulation<br>Stm 25d/Stm 25d post SCI<br>Number of back legs errors          | 0.0033  |
| <b>S3.D</b> | Two-tailed Mann-Whitney U test | Chronical context stimulation<br>Stm 40d/Stm 40d post SCI<br>Number of back legs errors          | 0.0080  |
| <b>S3.E</b> | Two-tailed Mann-Whitney U test | Chronical context stimulation<br>Control 10d/Control 10d post SCI<br>Total back legs errors time | 0.4908  |
| <b>S3.E</b> | Two-tailed Mann-Whitney U test | Chronical context stimulation<br>Stm 25d/Stm 25d post SCI<br>Total back legs errors time         | 0.011   |
| <b>S3.E</b> | Two-tailed Mann-Whitney U test | Chronical context stimulation<br>Stm 40d/Stm 40d post SCI<br>Total back legs errors time         | 0.1199  |
| <b>S3.F</b> | Two-tailed Mann-Whitney U test | Chronical context stimulation<br>Control 10d/Control 10d post SCI<br>Total crossing time         | 0.0311  |
| <b>S3.F</b> | Two-tailed Mann-Whitney U test | Chronical context stimulation<br>Stm 25d/Stm 25d post SCI<br>Total crossing time                 | 0.00198 |

|                 |                                |                                                                                  |                                                                                                   |
|-----------------|--------------------------------|----------------------------------------------------------------------------------|---------------------------------------------------------------------------------------------------|
| <b>S3.F</b>     | Two-tailed Mann-Whitney U test | Chronical context stimulation<br>Stm 40d/Stm 40d post SCI<br>Total crossing time | 0.0078                                                                                            |
| <b>Table S3</b> | One-Way ANOVA                  | Protein quantification                                                           | Table S2 :<br>peptide features<br>p-value.q-value<0.05<br>power greater than 0.8<br>Were retained |

**Supplement Table III Table of proteins deregulated in Stm (rTSMS treated) mice  
15 days after SCI from spinal cord samples.**

This table lists the protein abbreviation and full name of the 156 proteins upregulated after rTSMS treatment 15 days after SCI. Quantifications are expressed as average  $\pm$  SEM. N= 4 animals per group. Statistical evaluations were based on one-way ANOVA.

| Accession   | Description                                                                       | Peptide count | Confidence score | Anova (p) | Max fold change | Highest mean condition | Lowest mean condition |
|-------------|-----------------------------------------------------------------------------------|---------------|------------------|-----------|-----------------|------------------------|-----------------------|
| 1433B_MOUSE | 14-3-3 protein beta/alpha                                                         | 3             | 164,22           | 2,75E-03  | 1,14            | Stm                    | Control               |
| 1433E_MOUSE | 14-3-3 protein epsilon                                                            | 4             | 179,93           | 4,17E-03  | 1,15            | Stm                    | Control               |
| 1433G_MOUSE | 14-3-3 protein gamma                                                              | 3             | 172,47           | 1,19E-02  | 1,09            | Stm                    | Control               |
| 1433Z_MOUSE | 14-3-3 protein zeta/delta                                                         | 2             | 118,54           | 1,94E-03  | 1,20            | Stm                    | Control               |
| 2AAA_MOUSE  | Serine/threonine-protein phosphatase 2A 65 kDa regulatory subunit A alpha isoform | 2             | 85,07            | 5,27E-03  | 1,37            | Stm                    | Control               |
| AATC_MOUSE  | Aspartate aminotransferase, cytoplasmic                                           | 7             | 233,63           | 8,06E-03  | 1,10            | Stm                    | Control               |
| AATM_MOUSE  | Aspartate aminotransferase, mitochondrial                                         | 3             | 221,67           | 6,49E-04  | 1,15            | Stm                    | Control               |
| ACTB_MOUSE  | Actin, cytoplasmic 1                                                              | 6             | 241,07           | 1,26E-02  | 1,12            | Stm                    | Control               |
| ACTZ_MOUSE  | Alpha-centractin                                                                  | 3             | 83,98            | 3,40E-03  | 1,39            | Stm                    | Control               |
| ADT1_MOUSE  | ADP/ATP translocase 1                                                             | 2             | 87,29            | 1,39E-03  | 1,26            | Stm                    | Control               |
| AINX_MOUSE  | Alpha-internexin                                                                  | 9             | 532,89           | 2,66E-04  | 1,18            | Stm                    | Control               |
| ALBU_MOUSE  | Serum albumin                                                                     | 2             | 82,65            | 9,05E-03  | 1,49            | Stm                    | Control               |
| ALDOA_MOUSE | Fructose-bisphosphate aldolase A                                                  | 9             | 513,11           | 2,18E-03  | 1,13            | Stm                    | Control               |
| AT1A3_MOUSE | Sodium/potassium-transporting ATPase subunit alpha-3                              | 2             | 64,68            | 1,34E-03  | 2,00            | Stm                    | Control               |
| AT1B1_MOUSE | Sodium/potassium-transporting ATPase subunit beta-1                               | 4             | 188,62           | 4,36E-04  | 1,22            | Stm                    | Control               |
| AT1B2_MOUSE | Sodium/potassium-transporting ATPase subunit beta-2                               | 3             | 147,33           | 5,93E-03  | 1,24            | Stm                    | Control               |
| AT5F1_MOUSE | ATP synthase F(0) complex subunit B1, mitochondrial                               | 4             | 202,94           | 8,56E-04  | 1,21            | Stm                    | Control               |
| ATP5H_MOUSE | ATP synthase subunit d, mitochondrial                                             | 6             | 342,49           | 9,64E-05  | 1,31            | Stm                    | Control               |
| ATPA_MOUSE  | ATP synthase subunit alpha, mitochondrial                                         | 8             | 327,31           | 1,71E-04  | 1,13            | Stm                    | Control               |
| ATPB_MOUSE  | ATP synthase subunit beta, mitochondrial                                          | 3             | 213,71           | 8,55E-03  | 1,12            | Stm                    | Control               |
| ATPD_MOUSE  | ATP synthase subunit delta, mitochondrial                                         | 2             | 115,07           | 3,70E-04  | 1,29            | Stm                    | Control               |
| ATPO_MOUSE  | ATP synthase subunit O, mitochondrial                                             | 4             | 175,28           | 5,06E-04  | 1,33            | Stm                    | Control               |
| BACH_MOUSE  | Cytosolic acyl coenzyme A thioester hydrolase                                     | 2             | 110,73           | 1,20E-02  | 1,35            | Stm                    | Control               |
| BASP1_MOUSE | Brain acid soluble protein 1                                                      | 5             | 276,76           | 9,68E-03  | 1,38            | Stm                    | Control               |
| CALM1_MOUSE | Calmodulin-1                                                                      | 3             | 154,45           | 7,58E-05  | 1,44            | Stm                    | Control               |
| CALR_MOUSE  | Calreticulin                                                                      | 2             | 76,09            | 3,86E-03  | 1,46            | Stm                    | Control               |
| CDC42_MOUSE | Cell division control protein 42 homolog                                          | 2             | 71,33            | 3,49E-03  | 1,30            | Stm                    | Control               |
| CEND_MOUSE  | Cell cycle exit and neuronal differentiation protein 1                            | 5             | 326,46           | 9,24E-04  | 1,21            | Stm                    | Control               |
| CH60_MOUSE  | 60 kDa heat shock protein, mitochondrial                                          | 3             | 189,48           | 6,79E-03  | 1,24            | Stm                    | Control               |
| CISY_MOUSE  | Citrate synthase, mitochondrial                                                   | 2             | 55,19            | 3,63E-03  | 1,14            | Stm                    | Control               |
| CN37_MOUSE  | 2',3'-cyclic-nucleotide 3'-phosphodiesterase                                      | 7             | 331,91           | 1,69E-03  | 1,17            | Stm                    | Control               |
| COF1_MOUSE  | Cofilin-1                                                                         | 5             | 316,65           | 2,10E-04  | 1,50            | Stm                    | Control               |
| CSRP1_MOUSE | Cysteine and glycine-rich protein 1                                               | 6             | 267,53           | 2,62E-03  | 1,32            | Stm                    | Control               |
| DEST_MOUSE  | Destrin                                                                           | 2             | 138,95           | 1,50E-03  | 1,28            | Stm                    | Control               |
| DHE3_MOUSE  | Glutamate dehydrogenase 1, mitochondrial                                          | 4             | 167,98           | 2,67E-03  | 1,27            | Stm                    | Control               |
| DLDH_MOUSE  | Dihydrolipoyl dehydrogenase, mitochondrial                                        | 4             | 222,37           | 1,34E-04  | 1,31            | Stm                    | Control               |
| DPYL2_MOUSE | Dihydropyrimidinase-related protein 2                                             | 5             | 296,38           | 8,72E-03  | 1,10            | Stm                    | Control               |
| EF1A2_MOUSE | Elongation factor 1-alpha 2                                                       | 2             | 97,19            | 3,86E-03  | 1,20            | Stm                    | Control               |
| ENOA_MOUSE  | Alpha-enolase                                                                     | 9             | 518,89           | 1,18E-03  | 1,24            | Stm                    | Control               |
| ENOG_MOUSE  | Gamma-enolase                                                                     | 4             | 236,47           | 2,05E-03  | 1,16            | Stm                    | Control               |
| ES1_MOUSE   | ES1 protein homolog, mitochondrial                                                | 2             | 81,52            | 2,44E-04  | 1,26            | Stm                    | Control               |
| ETFA_MOUSE  | Electron transfer flavoprotein subunit alpha, mitochondrial                       | 2             | 107,27           | 9,34E-03  | 1,19            | Stm                    | Control               |
| ETFB_MOUSE  | Electron transfer flavoprotein subunit beta                                       | 2             | 78,14            | 2,03E-04  | 1,22            | Stm                    | Control               |
| FUMH_MOUSE  | Fumarate hydratase, mitochondrial                                                 | 2             | 65,21            | 1,32E-03  | 1,22            | Stm                    | Control               |
| G3P_MOUSE   | Glyceraldehyde-3-phosphate dehydrogenase                                          | 2             | 95,58            | 1,91E-03  | 1,18            | Stm                    | Control               |
| G6PI_MOUSE  | Glucose-6-phosphate isomerase                                                     | 5             | 151,7            | 1,18E-03  | 1,18            | Stm                    | Control               |
| GABT_MOUSE  | 4-aminobutyrate aminotransferase, mitochondrial                                   | 3             | 123,78           | 1,16E-02  | 1,15            | Stm                    | Control               |
| GBB2_MOUSE  | Guanine nucleotide-binding protein G(I)/G(S)/G(T) subunit beta-2                  | 4             | 148,19           | 8,66E-03  | 1,26            | Stm                    | Control               |

|             |                                                                                |   |        |          |       |     |         |
|-------------|--------------------------------------------------------------------------------|---|--------|----------|-------|-----|---------|
| GDIB_MOUSE  | Rab GDP dissociation inhibitor beta                                            | 2 | 85,22  | 4,33E-03 | 1,32  | Stm | Control |
| GLNA_MOUSE  | Glutamine synthetase                                                           | 5 | 220,02 | 5,93E-04 | 1,19  | Stm | Control |
| GLO2_MOUSE  | Hydroxyacylglutathione hydrolase, mitochondrial                                | 2 | 73,25  | 6,48E-03 | 1,24  | Stm | Control |
| GLTP_MOUSE  | Glycolipid transfer protein                                                    | 3 | 140,24 | 1,26E-03 | 1,32  | Stm | Control |
| GNAO_MOUSE  | Guanine nucleotide-binding protein G(o) subunit alpha                          | 4 | 176,2  | 2,92E-03 | 1,20  | Stm | Control |
| GPDA_MOUSE  | Glycerol-3-phosphate dehydrogenase [NAD(+)], cytoplasmic                       | 3 | 133,73 | 1,04E-02 | 1,26  | Stm | Control |
| GSTM1_MOUSE | Glutathione S-transferase Mu 1                                                 | 6 | 227,21 | 5,84E-03 | 1,35  | Stm | Control |
| GSTM5_MOUSE | Glutathione S-transferase Mu 5                                                 | 4 | 161,65 | 5,03E-03 | 1,39  | Stm | Control |
| H2B1B_MOUSE | Histone H2B type 1-B                                                           | 3 | 77,17  | 1,08E-02 | 1,16  | Stm | Control |
| H3C_MOUSE   | Histone H3.3C                                                                  | 2 | 59,59  | 5,47E-03 | 1,20  | Stm | Control |
| HSP7C_MOUSE | Heat shock cognate 71 kDa protein                                              | 3 | 112,03 | 6,29E-03 | 1,19  | Stm | Control |
| K1H1_MOUSE  | Keratin, type I cuticular Ha1                                                  | 4 | 158,25 | 1,40E-02 | 16,27 | Stm | Control |
| KAD1_MOUSE  | Adenylate kinase isoenzyme 1                                                   | 4 | 133,33 | 1,57E-03 | 1,27  | Stm | Control |
| KAD3_MOUSE  | GTP:AMP phosphotransferase AK3, mitochondrial                                  | 2 | 60,94  | 3,60E-03 | 1,12  | Stm | Control |
| KCC2G_MOUSE | Calcium/calmodulin-dependent protein kinase type II subunit gamma              | 2 | 105,73 | 1,49E-02 | 1,89  | Stm | Control |
| KCRB_MOUSE  | Creatine kinase B-type                                                         | 4 | 148,96 | 7,04E-03 | 1,14  | Stm | Control |
| LDHB_MOUSE  | L-lactate dehydrogenase B chain                                                | 6 | 304,38 | 1,50E-03 | 1,13  | Stm | Control |
| LIS1_MOUSE  | Platelet-activating factor acetylhydrolase IB subunit alpha                    | 3 | 117,76 | 3,77E-03 | 1,23  | Stm | Control |
| MBP_MOUSE   | Myelin basic protein                                                           | 5 | 282,58 | 2,76E-03 | 1,23  | Stm | Control |
| MDHC_MOUSE  | Malate dehydrogenase, cytoplasmic                                              | 2 | 127,62 | 2,59E-03 | 1,14  | Stm | Control |
| MDHM_MOUSE  | Malate dehydrogenase, mitochondrial                                            | 5 | 223,45 | 2,35E-04 | 1,15  | Stm | Control |
| MIC19_MOUSE | MICOS complex subunit Mic19                                                    | 2 | 92,91  | 1,56E-03 | 1,25  | Stm | Control |
| MIC25_MOUSE | MICOS complex subunit Mic25                                                    | 2 | 117,11 | 4,33E-03 | 1,45  | Stm | Control |
| MK03_MOUSE  | Mitogen-activated protein kinase 3                                             | 2 | 61,84  | 8,87E-03 | 1,17  | Stm | Control |
| MOG_MOUSE   | Myelin-oligodendrocyte glycoprotein                                            | 2 | 110,16 | 7,56E-04 | 1,10  | Stm | Control |
| NDKB_MOUSE  | Nucleoside diphosphate kinase B                                                | 2 | 60,38  | 2,35E-03 | 1,24  | Stm | Control |
| NDUA8_MOUSE | NADH dehydrogenase [ubiquinone] 1 alpha subcomplex subunit 8                   | 2 | 61,97  | 8,78E-03 | 1,26  | Stm | Control |
| NDUA9_MOUSE | NADH dehydrogenase [ubiquinone] 1 alpha subcomplex subunit 9, mitochondrial    | 2 | 72,03  | 5,06E-03 | 1,36  | Stm | Control |
| NDUAC_MOUSE | NADH dehydrogenase [ubiquinone] 1 alpha subcomplex subunit 12                  | 3 | 156,13 | 1,03E-02 | 1,37  | Stm | Control |
| NDUBA_MOUSE | NADH dehydrogenase [ubiquinone] 1 beta subcomplex subunit 10                   | 3 | 127,41 | 3,24E-04 | 1,18  | Stm | Control |
| NDUS2_MOUSE | NADH dehydrogenase [ubiquinone] iron-sulfur protein 2, mitochondrial           | 2 | 86,49  | 5,99E-04 | 1,15  | Stm | Control |
| NDUS4_MOUSE | NADH dehydrogenase [ubiquinone] iron-sulfur protein 4, mitochondrial           | 2 | 45,01  | 6,99E-04 | 1,20  | Stm | Control |
| NDUS6_MOUSE | NADH dehydrogenase [ubiquinone] iron-sulfur protein 6, mitochondrial           | 2 | 62,62  | 8,49E-04 | 2,09  | Stm | Control |
| NDUS7_MOUSE | NADH dehydrogenase [ubiquinone] iron-sulfur protein 7, mitochondrial           | 2 | 54,93  | 8,82E-04 | 1,43  | Stm | Control |
| NEUM_MOUSE  | Neuromodulin                                                                   | 2 | 98,76  | 3,03E-03 | 1,20  | Stm | Control |
| NFH_MOUSE   | Neurofilament heavy polypeptide                                                | 2 | 97,9   | 4,38E-03 | 1,24  | Stm | Control |
| NFM_MOUSE   | Neurofilament medium polypeptide                                               | 5 | 256,4  | 5,88E-03 | 1,34  | Stm | Control |
| ODPA_MOUSE  | Pyruvate dehydrogenase E1 component subunit alpha, somatic form, mitochondrial | 3 | 156,48 | 6,82E-03 | 1,10  | Stm | Control |
| ODPB_MOUSE  | Pyruvate dehydrogenase E1 component subunit beta, mitochondrial                | 2 | 92,53  | 2,58E-03 | 1,16  | Stm | Control |
| ODPX_MOUSE  | Pyruvate dehydrogenase protein X component, mitochondrial                      | 2 | 63,45  | 4,25E-04 | 1,30  | Stm | Control |
| OTUB1_MOUSE | Ubiquitin thioesterase OTUB1                                                   | 2 | 118,79 | 4,29E-03 | 1,16  | Stm | Control |
| PACN1_MOUSE | Protein kinase C and casein kinase substrate in neurons protein 1              | 3 | 189,39 | 6,54E-03 | 1,17  | Stm | Control |
| PARK7_MOUSE | Protein/nucleic acid deglycase DJ-1                                            | 4 | 155,41 | 8,82E-04 | 1,30  | Stm | Control |
| PCBP1_MOUSE | Poly(rC)-binding protein 1                                                     | 2 | 44,01  | 3,50E-03 | 1,13  | Stm | Control |
| PCSK1_MOUSE | ProSAAS                                                                        | 3 | 139,42 | 8,13E-03 | 1,20  | Stm | Control |
| PEBP1_MOUSE | Phosphatidylethanolamine-binding protein 1                                     | 3 | 124,93 | 1,17E-03 | 1,21  | Stm | Control |
| PGAM1_MOUSE | Phosphoglycerate mutase 1                                                      | 4 | 219,97 | 5,70E-03 | 1,30  | Stm | Control |
| PGK1_MOUSE  | Phosphoglycerate kinase 1                                                      | 2 | 156,09 | 1,38E-02 | 1,33  | Stm | Control |
| PGM1_MOUSE  | Phosphoglucomutase-1                                                           | 3 | 121,78 | 6,29E-03 | 1,22  | Stm | Control |
| PIMT_MOUSE  | Protein-L-isoaspartate(D-aspartate) O-methyltransferase                        | 3 | 150,1  | 8,52E-03 | 1,27  | Stm | Control |

|             |                                                                         |   |        |          |      |     |         |
|-------------|-------------------------------------------------------------------------|---|--------|----------|------|-----|---------|
| PP1B_MOUSE  | Serine/threonine-protein phosphatase PP1-beta catalytic subunit         | 2 | 46,76  | 1,41E-02 | 1,35 | Stm | Control |
| PPIA_MOUSE  | Peptidyl-prolyl cis-trans isomerase A                                   | 3 | 172,39 | 1,10E-03 | 1,24 | Stm | Control |
| PRDX1_MOUSE | Peroxiredoxin-1                                                         | 7 | 240,3  | 6,54E-04 | 1,16 | Stm | Control |
| PRDX2_MOUSE | Peroxiredoxin-2                                                         | 4 | 201,16 | 8,70E-05 | 1,26 | Stm | Control |
| PRDX3_MOUSE | Thioredoxin-dependent peroxide reductase, mitochondrial                 | 4 | 141,08 | 1,20E-04 | 1,39 | Stm | Control |
| PRDX5_MOUSE | Peroxiredoxin-5, mitochondrial                                          | 4 | 196,71 | 2,74E-04 | 1,20 | Stm | Control |
| PSB6_MOUSE  | Proteasome subunit beta type-6                                          | 2 | 86,45  | 4,22E-04 | 1,29 | Stm | Control |
| QCR1_MOUSE  | Cytochrome b-c1 complex subunit 1, mitochondrial                        | 4 | 173,31 | 4,60E-04 | 1,14 | Stm | Control |
| QCR2_MOUSE  | Cytochrome b-c1 complex subunit 2, mitochondrial                        | 5 | 250,53 | 5,33E-03 | 1,19 | Stm | Control |
| RAB10_MOUSE | Ras-related protein Rab-10                                              | 5 | 231,73 | 1,00E-03 | 1,29 | Stm | Control |
| RAB1A_MOUSE | Ras-related protein Rab-1A                                              | 6 | 218,05 | 4,09E-05 | 1,28 | Stm | Control |
| RAB2A_MOUSE | Ras-related protein Rab-2A                                              | 2 | 80,56  | 6,76E-03 | 1,19 | Stm | Control |
| RAC1_MOUSE  | Ras-related C3 botulinum toxin substrate 1                              | 2 | 87,15  | 3,61E-04 | 1,33 | Stm | Control |
| RAP1A_MOUSE | Ras-related protein Rap-1A                                              | 3 | 122,9  | 6,36E-04 | 1,33 | Stm | Control |
| RAP1B_MOUSE | Ras-related protein Rap-1b                                              | 3 | 111,27 | 9,39E-03 | 1,33 | Stm | Control |
| RHOB_MOUSE  | Rho-related GTP-binding protein RhoB                                    | 3 | 128,67 | 1,45E-03 | 1,32 | Stm | Control |
| RHOG_MOUSE  | Rho-related GTP-binding protein RhoG                                    | 5 | 192,3  | 1,28E-03 | 1,29 | Stm | Control |
| RL11_MOUSE  | 60S ribosomal protein L11                                               | 2 | 68,45  | 2,58E-03 | 1,42 | Stm | Control |
| RLA0_MOUSE  | 60S acidic ribosomal protein P0                                         | 2 | 81,05  | 1,07E-03 | 1,30 | Stm | Control |
| ROA2_MOUSE  | Heterogeneous nuclear ribonucleoproteins A2/B1                          | 2 | 61,53  | 1,14E-02 | 1,07 | Stm | Control |
| SAHH2_MOUSE | S-adenosylhomocysteine hydrolase-like protein 1                         | 3 | 93,64  | 3,77E-03 | 1,20 | Stm | Control |
| SDHB_MOUSE  | Succinate dehydrogenase [ubiquinone] iron-sulfur subunit, mitochondrial | 2 | 93,16  | 9,25E-03 | 1,31 | Stm | Control |
| SEPT7_MOUSE | Septin-7                                                                | 2 | 69,56  | 2,63E-03 | 1,16 | Stm | Control |
| SKP1_MOUSE  | S-phase kinase-associated protein 1                                     | 3 | 127,35 | 5,68E-04 | 1,31 | Stm | Control |
| SNAB_MOUSE  | Beta-soluble NSF attachment protein                                     | 3 | 208,2  | 8,61E-04 | 1,23 | Stm | Control |
| SODC_MOUSE  | Superoxide dismutase [Cu-Zn]                                            | 5 | 282,47 | 5,45E-05 | 1,36 | Stm | Control |
| SODM_MOUSE  | Superoxide dismutase [Mn], mitochondrial                                | 5 | 204,42 | 2,36E-04 | 1,36 | Stm | Control |
| SSDH_MOUSE  | Succinate-semialdehyde dehydrogenase, mitochondrial                     | 2 | 71,83  | 6,21E-05 | 1,20 | Stm | Control |
| STIP1_MOUSE | Stress-induced-phosphoprotein 1                                         | 2 | 61,75  | 5,99E-03 | 1,41 | Stm | Control |
| STMN1_MOUSE | Stathmin                                                                | 3 | 113,22 | 4,81E-03 | 1,18 | Stm | Control |
| STXB1_MOUSE | Syntaxin-binding protein 1                                              | 4 | 174,82 | 2,03E-03 | 1,30 | Stm | Control |
| SUCA_MOUSE  | Succinate--CoA ligase [ADP/GDP-forming] subunit alpha, mitochondrial    | 2 | 56,35  | 4,57E-03 | 1,14 | Stm | Control |
| SUCB1_MOUSE | Succinate--CoA ligase [ADP-forming] subunit beta, mitochondrial         | 4 | 239,08 | 1,74E-03 | 1,14 | Stm | Control |
| SYUA_MOUSE  | Alpha-synuclein                                                         | 4 | 142,85 | 1,99E-03 | 1,45 | Stm | Control |
| TAGL2_MOUSE | Transgelin-2                                                            | 2 | 52,25  | 8,68E-03 | 1,35 | Stm | Control |
| TAGL3_MOUSE | Transgelin-3                                                            | 5 | 182,57 | 3,25E-03 | 1,29 | Stm | Control |
| TAU_MOUSE   | Microtubule-associated protein tau                                      | 2 | 81,84  | 3,29E-03 | 1,32 | Stm | Control |
| THY1_MOUSE  | Thy-1 membrane glycoprotein                                             | 3 | 189,3  | 4,08E-03 | 1,14 | Stm | Control |
| TPIS_MOUSE  | Triosephosphate isomerase                                               | 4 | 204,1  | 1,06E-03 | 1,21 | Stm | Control |
| TPM3_MOUSE  | Tropomyosin alpha-3 chain                                               | 2 | 88,86  | 3,46E-03 | 1,70 | Stm | Control |
| TPPP3_MOUSE | Tubulin polymerization-promoting protein family member 3                | 2 | 43,04  | 2,55E-03 | 1,54 | Stm | Control |
| UBE2N_MOUSE | Ubiquitin-conjugating enzyme E2 N                                       | 3 | 119,47 | 7,53E-04 | 1,20 | Stm | Control |
| UCHL1_MOUSE | Ubiquitin carboxyl-terminal hydrolase isozyme L1                        | 5 | 334,55 | 1,85E-03 | 1,24 | Stm | Control |
| UCRI_MOUSE  | Cytochrome b-c1 complex subunit Rieske, mitochondrial                   | 4 | 130,12 | 4,32E-04 | 1,20 | Stm | Control |
| VAOD1_MOUSE | V-type proton ATPase subunit d 1                                        | 2 | 66,33  | 3,53E-03 | 1,18 | Stm | Control |
| VAMP2_MOUSE | Vesicle-associated membrane protein 2                                   | 2 | 105,07 | 1,25E-02 | 1,39 | Stm | Control |
| VDAC1_MOUSE | Voltage-dependent anion-selective channel protein 1                     | 7 | 445,09 | 2,79E-05 | 1,16 | Stm | Control |
| VDAC2_MOUSE | Voltage-dependent anion-selective channel protein 2                     | 4 | 248,68 | 1,33E-04 | 1,17 | Stm | Control |
| VDAC3_MOUSE | Voltage-dependent anion-selective channel protein 3                     | 3 | 154,51 | 8,10E-03 | 1,28 | Stm | Control |
| VISL1_MOUSE | Visinin-like protein 1                                                  | 2 | 100,5  | 1,76E-03 | 1,37 | Stm | Control |

|             |                                                                   |   |        |          |      |         |     |
|-------------|-------------------------------------------------------------------|---|--------|----------|------|---------|-----|
| ANXA2_MOUSE | Annexin A2                                                        | 2 | 101,62 | 2,09E-03 | 1,44 | Control | Stm |
| CADM4_MOUSE | Cell adhesion molecule 4                                          | 2 | 100,1  | 7,54E-03 | 1,26 | Control | Stm |
| KCC2D_MOUSE | Calcium/calmodulin-dependent protein kinase type II subunit delta | 2 | 86,17  | 1,37E-02 | 1,24 | Control | Stm |
| MOES_MOUSE  | Moesin                                                            | 3 | 126,53 | 4,62E-03 | 1,52 | Control | Stm |
| NCDN_MOUSE  | Neurochondrin                                                     | 6 | 233,42 | 9,45E-03 | 1,21 | Control | Stm |
| NDUS1_MOUSE | NADH-ubiquinone oxidoreductase 75 kDa subunit, mitochondrial      | 2 | 89,86  | 8,62E-03 | 1,42 | Control | Stm |
| SYN1_MOUSE  | Synapsin-1                                                        | 2 | 46,7   | 1,88E-03 | 1,36 | Control | Stm |
| VIME_MOUSE  | Vimentin                                                          | 4 | 104,73 | 7,65E-03 | 1,29 | Control | Stm |

**Supplement Fig I Locotronic test comparisons in chronic context one day after SCI and 10 days after SCI.**

(A) Quantification of the number of back legs errors 1 day and 10 days after SCI in juvenile mice. (B) Quantification of the total back legs errors time 1 day and 10 days after SCI in juvenile mice. (C) Quantification of the total crossing time 1 day and 10 days after SCI in juvenile mice. N=7 animals. (D) Quantification of the number of back legs errors 1 day and 10 days after SCI in aged mice. (E) Quantification of the total back legs errors time 1 day and 10 days after SCI in aged mice. (F) Quantification of the total crossing time 1 day and 10 days after SCI in aged mice. N=7 animals. Quantifications are expressed as average  $\pm$  SEM. ns= not significant.



Juvenile mice  
(P)30

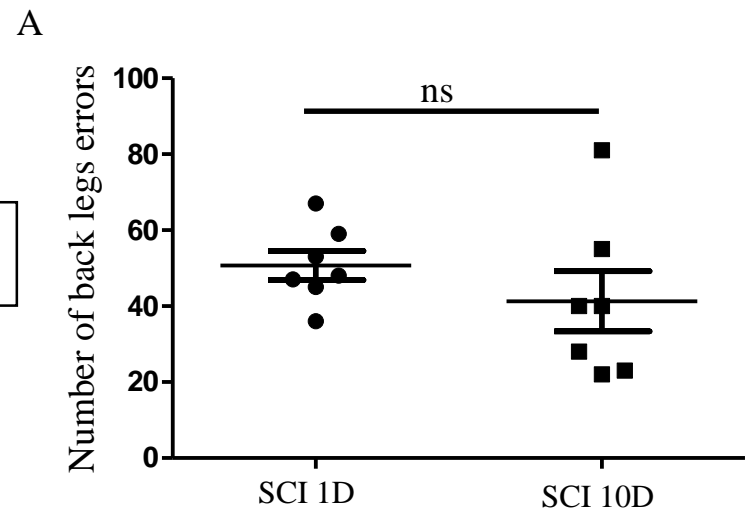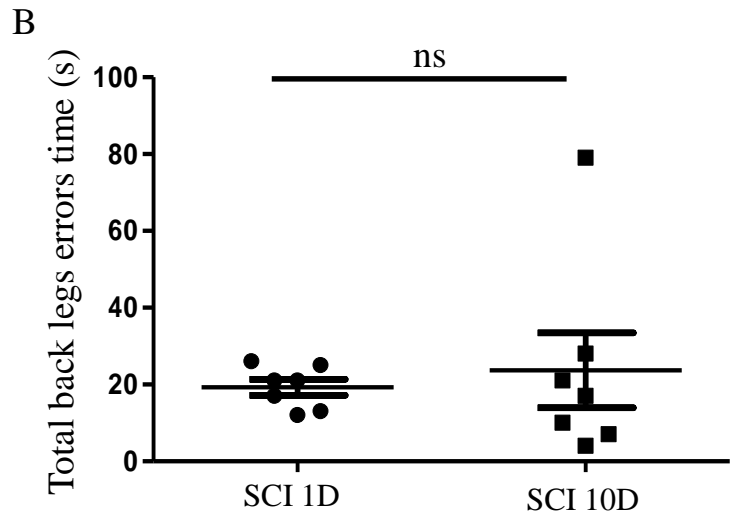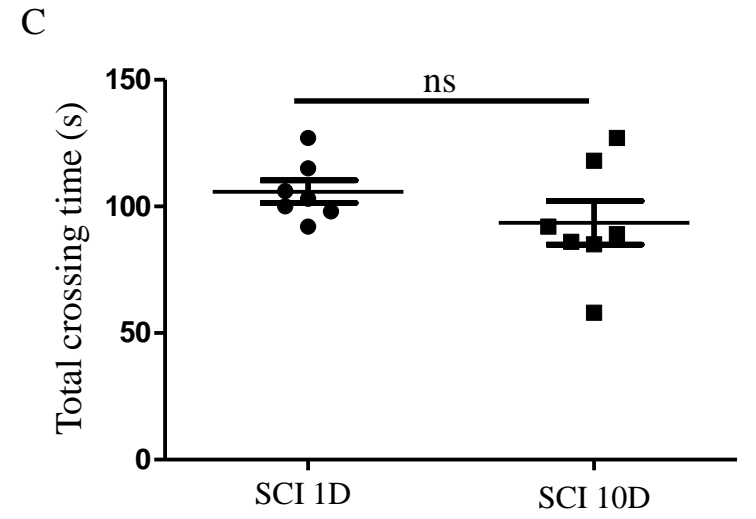

Aged mice  
18 - 24 months

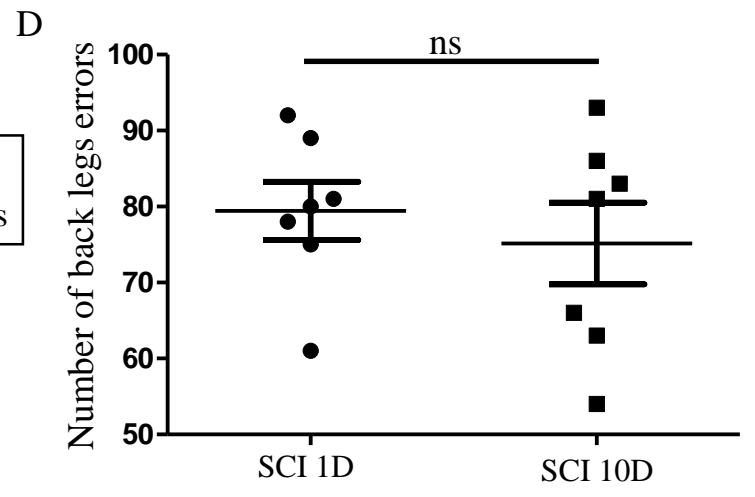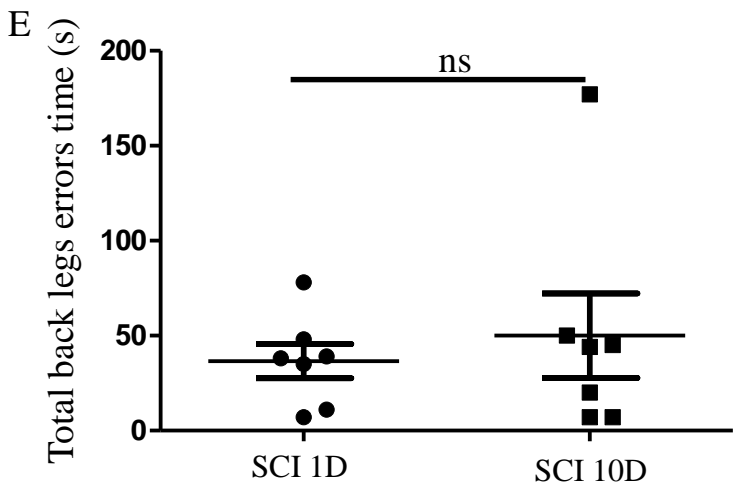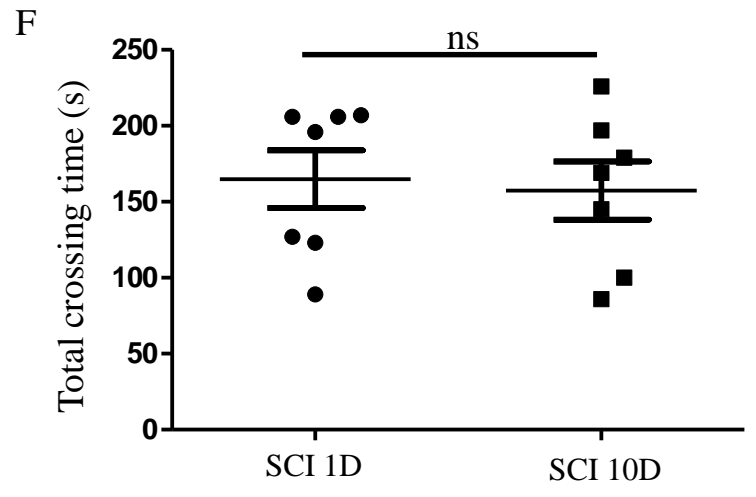

**Supplement Fig II Comparison of the fibrotic and glial components of the scar 15 days after SCI and 90 days after SCI.**

(A) Quantification of PDGFR $\beta$ <sup>+</sup> area 15 and 90 days after SCI in Control (SCI) mice and Stm (rTSMS treated) animals. (B) Quantification of GFAP negative area (GFAP<sup>-</sup>) 15 and 90 days after SCI in Control (SCI) mice and Stm (rTSMS treated) animals. N=5 animals per group at 15 days and N=4 animals per group at 90 days. Quantifications are expressed as average  $\pm$  SEM. ns= not significant.

A

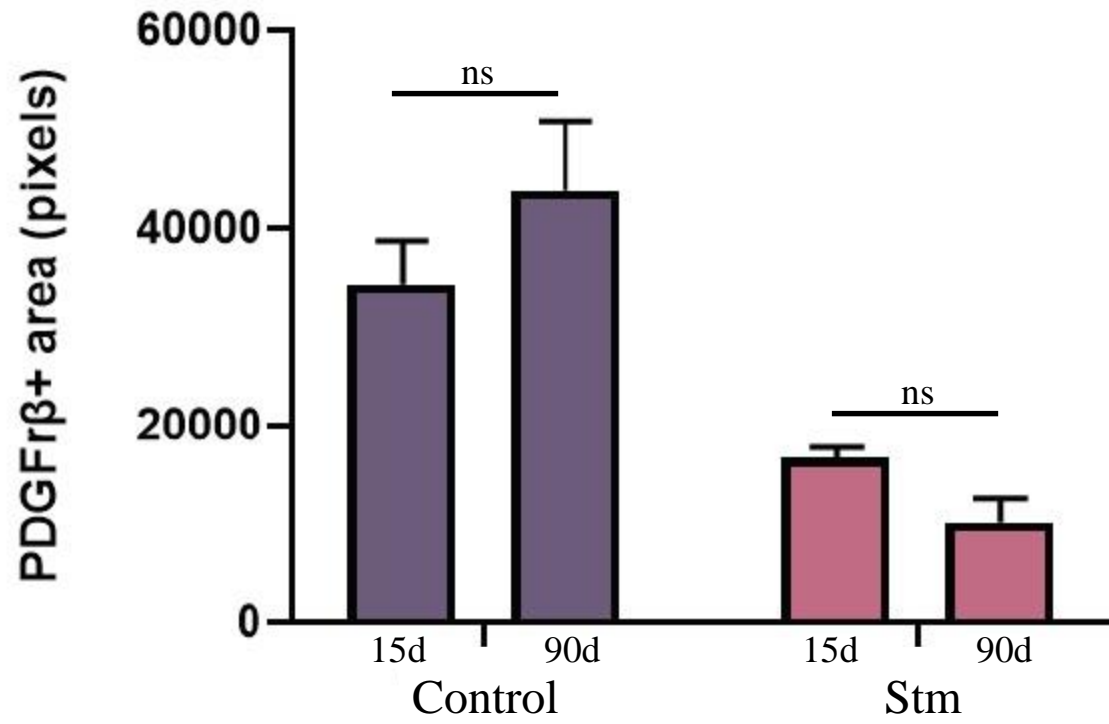

B

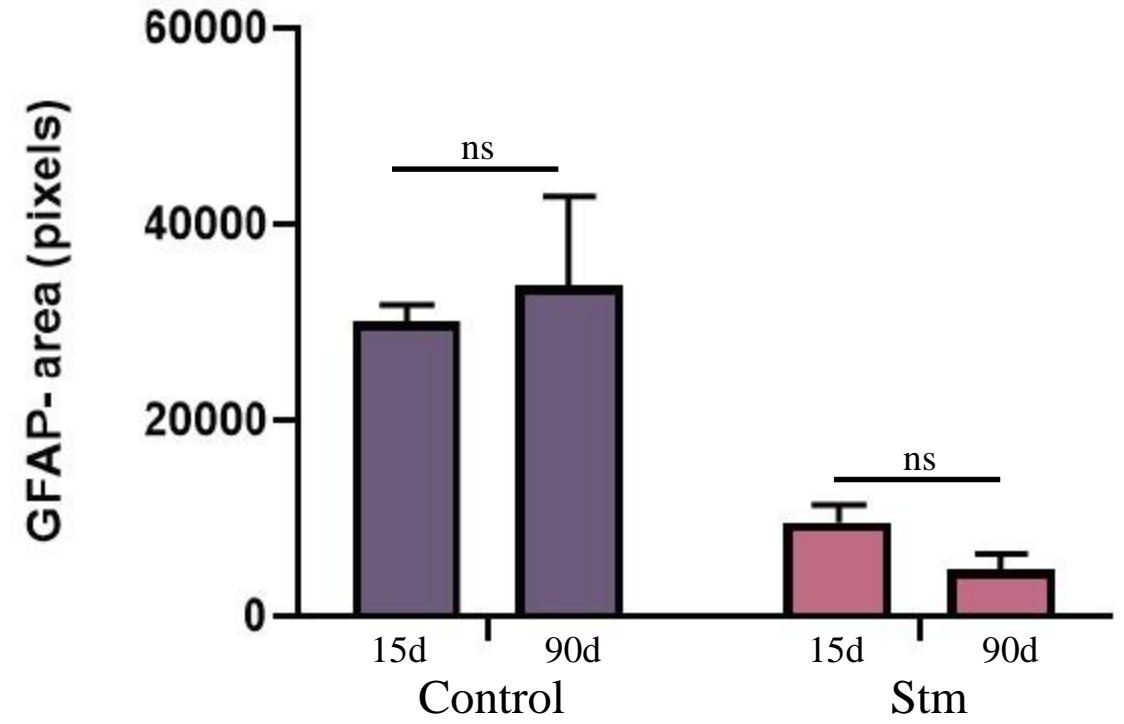

**Supplement Fig III Comparison of the locomotor performances between adult and juvenile mice and between adult and aged mice in chronic context.**

(A) Comparison of the number of back legs errors 10 days (Control SCI), 25 days and 40 days after SCI between adult and juvenile mice. (B) Comparison of the total back legs errors time 10 days, 25 days and 40 days after SCI between adult and juvenile mice. (C) Comparison of the total crossing time 10 days, 25 days and 40 days after SCI between adult and juvenile mice. N=9 animals at 10 days and 25 days and N=6 animals at 40 days for adult mice and N=7 animals at 10 days and 25 days and N=5 animals at 40 days for juvenile mice.

(D) Comparison of the number of back legs errors 10 days (Control SCI), 25 days and 40 days after SCI between adult and aged mice. (E) Comparison of the total back legs errors time 10 days, 25 days and 40 days after SCI between adult and aged mice. (F) Comparison of the total crossing time 10 days, 25 days and 40 days after SCI between adult and aged mice. N=9 animals at 10 days and 25 days and N=6 animals at 40 days for adult mice and N=7 animals at 10 days and 25 days and N=5 animals at 40 days for aged mice. Quantifications are expressed as average  $\pm$  SEM. ns=not significant \* =  $P < 0.05$ ; \*\* =  $P < 0.01$ .

□ Adult

■ Juvenile

A

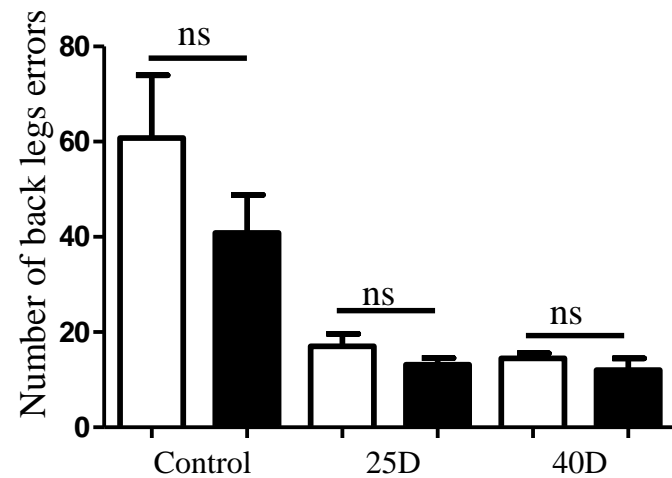

B

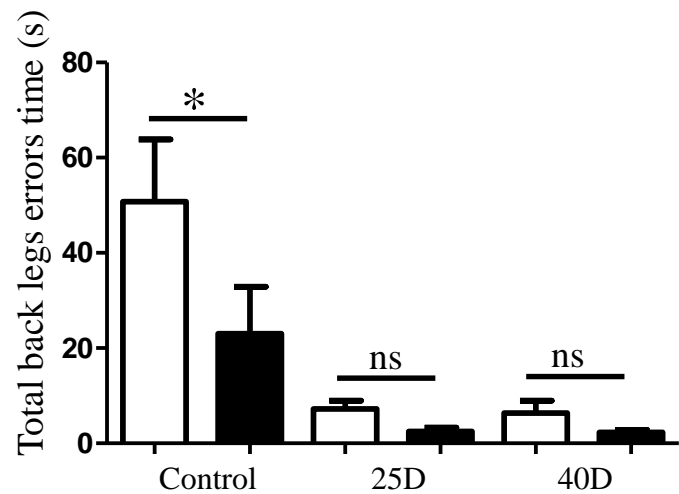

C

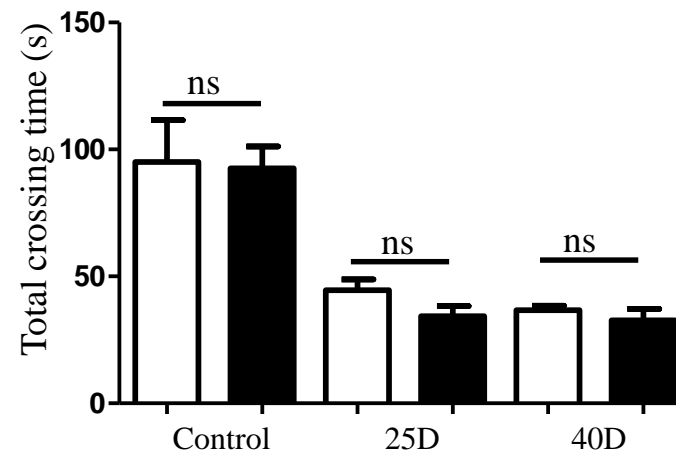

□ Adult

■ Aged

D

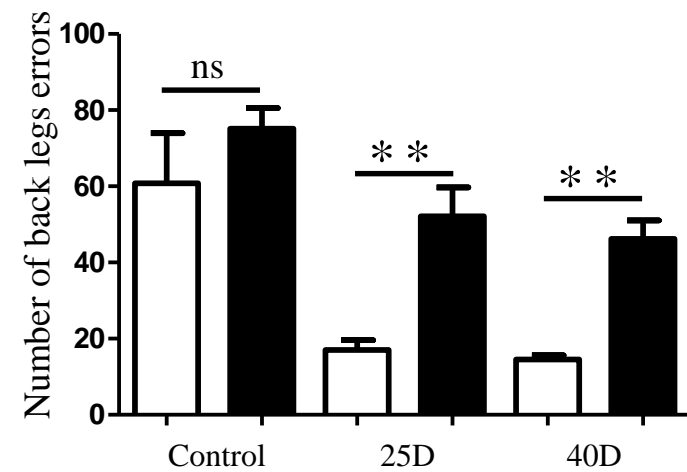

E

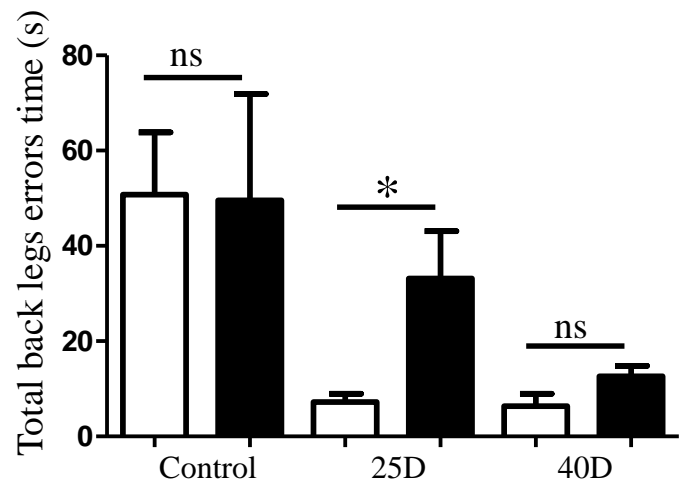

F

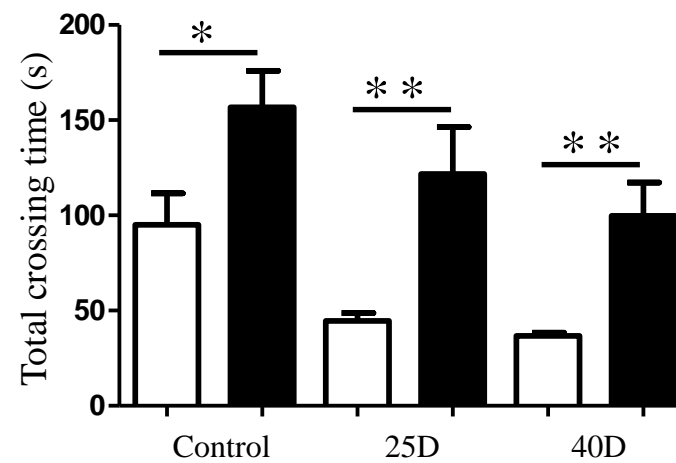

**Movie I rTSMS based treatment enhances functional recovery, related to Fig. 2.**  
**Videoclip of locotronic test 15 days after SCI in a Control mouse. This videoclip shows that SCI reduces locomotor function and induces spasticity.**

**Movie II rTSMS based treatment enhances functional recovery, related to Fig. 2.**

**Videoclip of locotronic test 15 days after SCI in an rTSMS treated mouse. This videoclip shows that rTSMS treatment enhances locomotor function.**
